# 1 **Playing the piano with a robotic third thumb: Assessing constraints of human** 2 **augmentation**

3 Ali Shafti<sup>1,2,3†</sup>, Shlomi Haar<sup>1,3†</sup>, Renato Mio<sup>1</sup>, Pierre Guilleminot<sup>1</sup>, and A. Aldo Faisal<sup>1,2,3,4\*</sup>

4 1. Brain and Behaviour Lab: Dept. of Bioengineering, Imperial College London, SW7 2AZ, London, UK

5 2. Dept. of Computing, Imperial College London, SW7 2AZ, London, UK

6 3. Behaviour Analytics Lab, Data Science Institute, SW7 2AZ, London, UK

7 4. UKRI CDT in AI for Healthcare, Imperial College London, SW7 2AZ, London, UK

8 5. MRC London Institute of Medical Sciences, W12 0NN, London, UK

9 † These authors contributed equally to this work as co first authors

10 \* Correspondence: [aldo.faisal@imperial.ac.uk](mailto:aldo.faisal@imperial.ac.uk)

## 11 **Abstract**

12 Contemporary robotics gives us mechatronic capabilities for augmenting human bodies with extra  
13 limbs. However, how our brains and bodies pose limits on such augmentation is an open question. We  
14 developed Supernumerary Robotic 3rd Thumbs (SR3T) with two degrees-of-freedom controlled by the  
15 user's body to endow them with an extra contralateral thumb on the hand. We demonstrate that a pianist  
16 can learn to play the piano with 11 fingers within an hour. We then evaluate 6 naïve and 6 experienced  
17 piano players in their prior motor coordination and their capability in piano playing with the robotic  
18 augmentation. Intriguingly, individuals' augmented performance did not depend on prior piano experience  
19 but could be predicted by our new custom motor coordination assessment, the Human Augmentation  
20 Motor Coordination Assessment (HAMCA) performed pre-augmentation. Our work demonstrates how  
21 supernumerary robotics can augment humans in skilled tasks and that individual differences in their  
22 augmentation capability are predictable by their individual brains' motor coordination abilities.

## 23 **Introduction**

24 From ancient myths, such as the many-armed goddess Shiva to modern comic book characters,  
25 augmentation with supernumerary (i.e. extra) limbs has captured our common imagination. In real  
26 life, Human Augmentation is emerging as the result of the confluence of robotics and  
27 neurotechnology. We are mechatronically able to augment the human body; from the first  
28 myoelectric prosthetic hand developed in the 1940s<sup>1</sup> to the mechanical design, control and feedback  
29 interfaces of modern bionic prosthetic hands<sup>e.g. 2-5</sup>. Robots have been used to augment the bodies of  
30 disabled humans, restoring some of their original capabilities<sup>e.g. 6-9</sup>. Similar setups can augment  
31 healthy users beyond their capabilities, e.g. augmenting workers in industrial settings through  
32 intelligent collaboration<sup>e.g. 10-12</sup>, or equipping them with additional arms to perform several tasks  
33 concurrently<sup>e.g. 13,14</sup>. The latter fits within a particular area of human augmentation robotics which is  
34 referred to as supernumerary robotics. These are robotic systems, typically worn by the user, to  
35 extend their body and its physical capabilities. However, a major question is, to what extent do the  
36 human brain and body have the capability of adapting and learning to use such technologies efficiently  
37<sup>15</sup>. The supernumerary and augmentative nature of this area of research presents an interesting  
38 challenge on how to map human motor commands to robot control.

39 Supernumerary robotic limbs<sup>e.g. 16</sup> are envisioned to assist human factory workers, and adapted for  
40 different types of applications<sup>e.g. 14</sup>. The introduction of supernumerary robotic fingers developed as  
41 a grasp support device<sup>17</sup> led to further exploration on optimal materials and mechanical designs for  
42 supernumerary robotics<sup>e.g. 9,18,19</sup>. Supernumerary robotic fingers have been particularly envisioned,

43 and successful in grasp restoration for stroke patients<sup>e.g. 9,20,21</sup>. However, regardless of the mechanism,  
44 material, and use case, given the presence of a human within these devices' control loops, the control  
45 interface is of essential importance.

46 It was recently shown that for polydactyly subjects who possess six fingers on their hands, the  
47 control interface involves a cortical representation of the supernumerary finger<sup>22</sup>. Unlike polydactyly,  
48 supernumerary robotic limbs and fingers must utilize indirect control interfaces to achieve the same  
49 goal – to enable more complex movements and better task performance. Abdi et. al investigate the  
50 feasibility of controlling a supernumerary robotic hand with the foot<sup>23</sup>. Others have focused on  
51 electromyography (EMG) as the control interface – both in supernumerary robotic fingers<sup>e.g. 9</sup>, and  
52 supernumerary robotic limbs<sup>e.g. 24</sup>. Other interfaces used for supernumerary robotics include inertial  
53 measurement units<sup>e.g. 21</sup>, voice<sup>e.g. 25</sup>, pushbuttons<sup>e.g. 18</sup>, and graphical user interfaces<sup>e.g. 26</sup>. Researchers  
54 have also explored indirect control interfaces, e.g. using the concept of grasp synergies<sup>27</sup> to assume  
55 that the supernumerary robotic finger's posture will be highly correlated with that of natural fingers  
56 during manipulation, allowing supernumerary robotic finger control through natural movement of  
57 existing fingers<sup>28</sup>. Importantly, all these user interfaces focus on the interface and not the user.

58 While extensive research has been conducted on the mechanical design, interface, and control of  
59 supernumerary robotics, there is a gap in understanding the role of human motor control in the  
60 success and adoption of these robotic human augmentation systems. In the rapid development of  
61 human augmentation little attention is devoted to how humans interact with the technology and learn  
62 to control it<sup>15</sup>. There are clear needs for neuroscience and robotics research to come together in  
63 analysing such scenarios<sup>e.g. 29</sup>. Learning to control a supernumerary robot limb or finger is a complex  
64 process which involves learning to utilize one movement (set muscles activations) to perform a new  
65 movement. The field of motor neuroscience has extensively studied the control mechanisms and  
66 learning processes of perturbed movements, where we utilize arm movement in one direction to  
67 move a cursor on the screen in a different direction, accounting for a rotation perturbation<sup>30–33</sup> or a  
68 mirror reversal perturbation<sup>e.g. 34–36</sup>. In these settings, one can predict subjects learning from the task-  
69 relevant variability in their unperturbed movements<sup>e.g. 37,38</sup>. Nevertheless, these studies were done on  
70 simplistic lab-based tasks and only recently the field is starting to address the complexities of real-  
71 world movement and to ask to what extent those lab-based findings generalize to real world motor  
72 control and learning<sup>39,40</sup>. While the relationship between task-relevant variability and learning  
73 performance seems to generalize to real-world tasks, defining task relevance is less trivial<sup>e.g. 39</sup> and  
74 the learning mechanism can differ between users<sup>e.g. 41</sup>. In the case of augmentation technology, the  
75 relevant features can be either those related to performing the task itself without the augmented  
76 device, or features related to the control interface of the augmented device.

77 In human performance research, such as sports science and rehabilitation, there are significant  
78 efforts to predict future performance. In sports science, there is an attempt to predict athletes' future  
79 success for talent identification purposes. Motor coordination and motor learning are often used as  
80 predictors<sup>e.g. 42–45</sup>. Similar approaches are used in rehabilitation research to predict skill learning  
81 capacity following traumatic brain injury, stroke, or neurodegenerative disease<sup>e.g. 46,47</sup>. Here we are  
82 looking into the predictability of future performance with augmentation technology. We specifically

83 ask which aspect of motor coordination is a better predictor of performance with the device – i.e.  
84 performance in task related tests versus performance in control interface related tests.

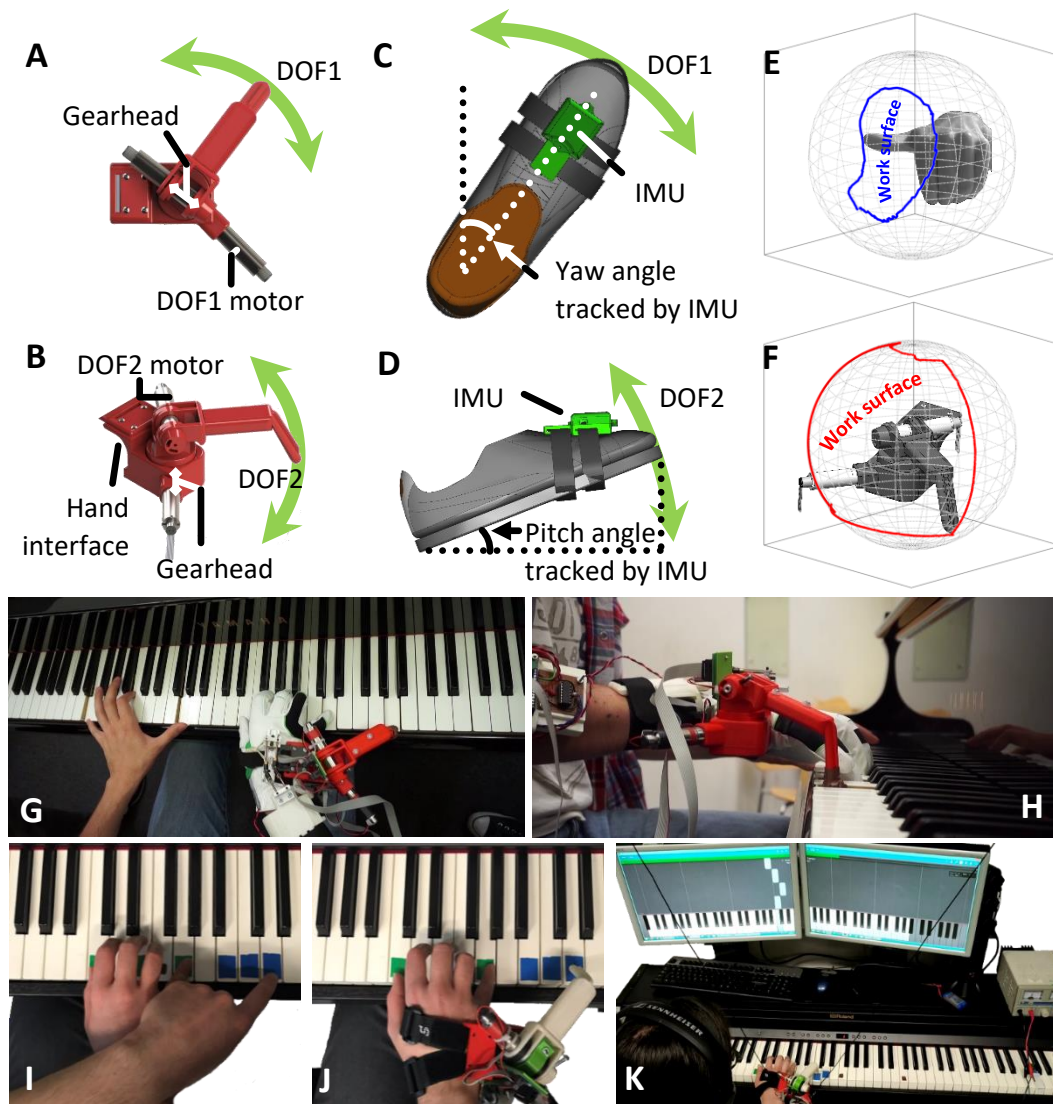

**Fig. 1. Piano playing task setup.** (A) Top view rendering of the SR3T, showing the horizontal motion DOF and relevant motor. (B) Side view rendering of the SR3T showing the vertical motion DOF and relevant motor. (C) Top view rendering of the SR3T control interface for the 1st degree of freedom (DOF); the participant controls the motion of the SR3T using their right foot, captured through an inertial measurement unit (IMU) worn on the foot. (D) Side view rendering of the SR3T control interface for the 2nd DOF. (E) Work surface of a human thumb end-point projected on a sphere for comparison with (F) the work surface of the SR3T end-point projected on a sphere – augmenting work surface range for the human (see methods). (G, H) Top and side view of the unconstrained pilot experiment: an experienced piano player freely improvising on the piano while wearing and making use of the SR3T, effectively playing 11-fingered piano within 1 hour of use. (I) Systematic experiments: playing the piano sequence using 5 fingers of the right hand plus the left-hand index finger (LHIF) and (J) Playing the sequence using the SR3T. (K) A participant plays the sequence of notes as displayed on the monitors in front of them, using the SR3T.

85 To address this, we have created an experimental setup to study how different parameters within  
86 the remit of human motor control contribute to successful control, coordination and usage of a human  
87 augmentative robotic system, using a set of motor coordination tests that we developed: the Human  
88 Augmentation Motor Coordination Assessment (HAMCA). We have created a 2 degrees of freedom

89 (DOF) robotic finger, worn on the side of the hand, to augment human finger count to 11, effectively  
90 giving them a 3rd thumb. We call this the supernumerary robotic 3rd thumb (SR3T – engineering and  
91 design previously described in <sup>48</sup>), and we study its usage in a skilled human task: playing the piano.  
92 The piano is a setting which involves the use of all fingers of the hand, and hence a good environment  
93 to consider for testing the augmentation of fingers. Furthermore, piano playing is structured both in  
94 spatial and temporal dimensions, allowing for quantification of the performance in both aspects.

95

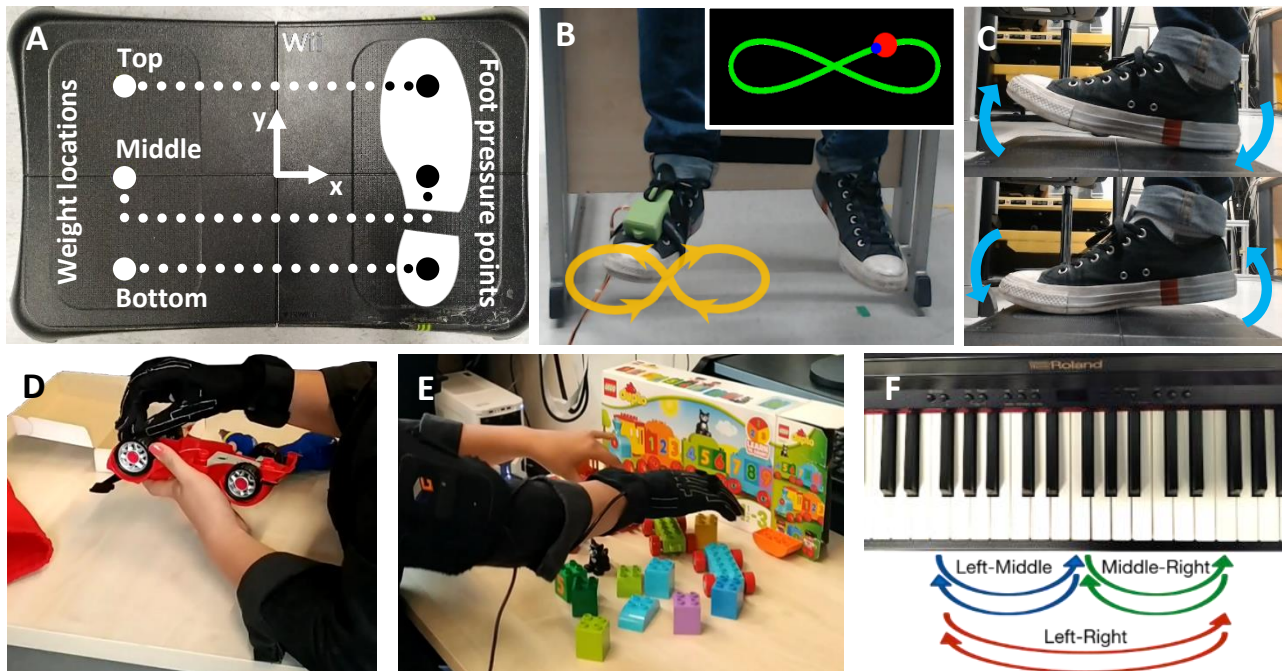

**Fig. 2. Human Augmentation Motor Coordination Assessment (HAMCA) – a set of simple behavioural tasks to predict the ability of human augmentation (see Methods for details). (A)** Balance board force measurement platform for the Foot-balance task. **(B)** Foot motion trajectory (curve and arrows) during the Foot-tracking task required to move the foot in a figure of 8 in a plane perpendicular to the resting foot’s major axis. (Inset) visual feedback to the participant on the computer screen in front of them, showing the desired trajectory (green curve), the red dot indicating the desired location of the foot tip for pacing the foot movement and the current location of the foot tip (blue dot). **(C)** See-saw like foot motion in the sagittal plane of the foot during the Foot up-down task. **(D,E)** Measurement of motor coordination complexity in the fingers of the right hand by assembly of a toy car and of a toy train in the Toy Assembly Task. **(F)** Piano-position task: Piano key sequences to be played with individual fingers to capture hand and finger positional acuity. Performance is assessed by timing and key board press down errors movement between 3 keys (spaced 1 octave apart) labelled “Left”, “Middle” and “Right”.

## 96 Results

97 We developed a mechanically powerful supernumerary robotic 3rd thumb (SR3T) and means for  
98 interfacing it with human users, initially through a combination of foot and thumb motions, directly  
99 controlling the two degrees of freedom of the SR3T. We then tested an experienced piano player in  
100 an unconstrained pilot experiment, allowing them to freely play the piano and improvise while  
101 wearing the SR3T. We observed that within 1 hour of playing the piano, the participant incorporated  
102 the SR3T in their piano playing, effectively playing the piano with 11 fingers (see Fig. 1G-H, and  
103 supplementary video). Based on this outcome, and feedback from the participant, we upgraded the  
104 control interface to be solely based on foot motions (see Fig. 1, and Methods), for more robust control,  
105 and to limit the interface to one limb. We then set out to understand the constraints affecting success  
106 with the SR3T, by devising protocols and behavioural markers for motor coordination evaluation: the  
107 Human Augmentation Motor Coordination Assessment (HAMCA). We also developed a piano  
108 sequence playing task as well as measures for assessing the quality of playing. Finally, we  
109 systematically evaluated the SR3T on human subjects, and predicted how well subjects would be able  
110 to perform in playing the piano sequence with an augmented additional finger, based on the basic  
111 motor coordination assay from the HAMCA. Twelve right-handed participants (6 experienced pianists  
112 and 6 naïve players), attended 2 experimental sessions held on separate days in the lab. In the first  
113 session they performed the HAMCA set of 8 tasks to assess their hand and foot motor coordination.  
114 This set was developed to investigate the possibility of a priori prediction of how well each individual  
115 human user can learn to use an augmented device. From the HAMCA we extracted 8 scores as  
116 measures of hand and foot motor coordination (see Methods). In the second session the subjects  
117 learned to play a sequence on the piano and then repeated it with our human augmentation device,  
118 the supernumerary robotic 3rd thumb (SR3T), operated through foot motions as the interface (Fig. 1).

119 The hand and foot motor-coordination scores from the HAMCA, recorded during the first  
120 experimental session, showed moderate differences between the pianists and the naïve players (Fig.

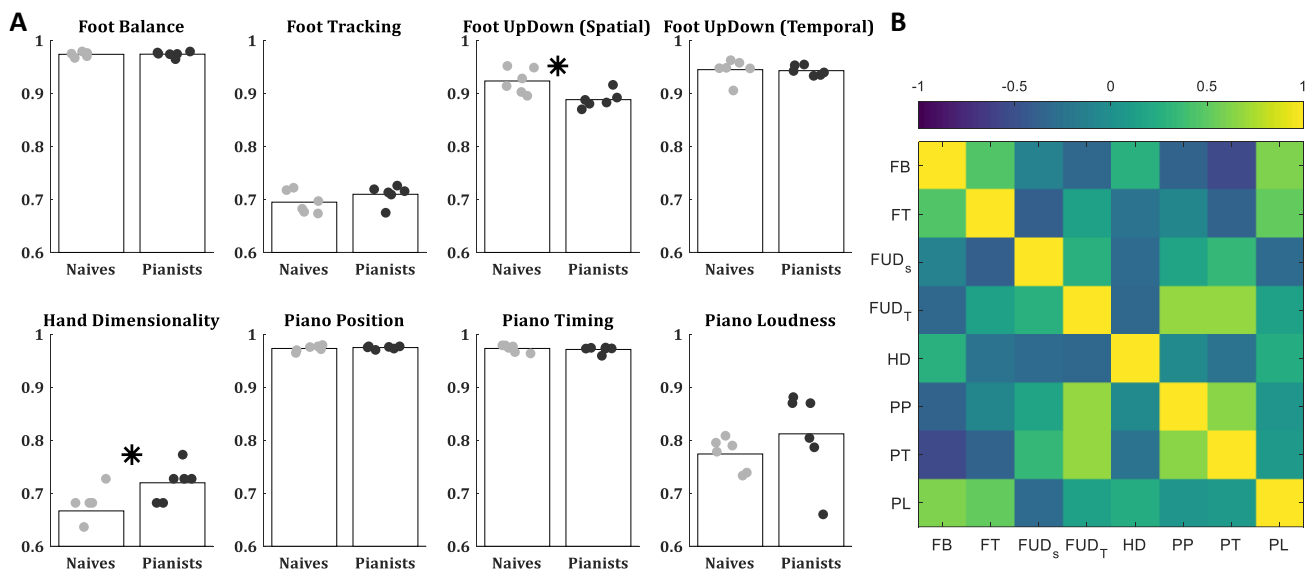

**Fig. 3. Performance of all subjects in the HAMCA.** Showing results for 6 naïve (grey dots) and 6 experienced piano players (black dots). **(A)** Accuracy in HAMCA tasks (foot Balance - FB, foot tracking - FT, foot up down spatial - FUD<sub>s</sub>, foot up down temporal - FUD<sub>T</sub>, hand dimensionality - HD, piano positioning - PP, piano timing - PT, piano loudness - PL). **(B)** Pearson's correlations between the accuracies of all HAMCA tasks across subjects. The 6 naïve and 6 experienced players were lumped together as individual performances were not different between the groups (see main text).

121 3A). There were no significant group differences in any of the piano-based tasks (Piano Position, Piano  
 122 Timing, and Piano Loudness). The only measure where the pianists performed significantly different  
 123 to the naïve players was Hand Dimensionality ( $p = 0.049$ ), which is based on the assembly of toys (see  
 124 Methods). On the other hand, in the Foot Up-Down Spatial measure the naïve players showed higher  
 125 scores than the pianists ( $p = 0.012$ ), though we believe this difference is possibly the result of a sample  
 126 bias due to the small N. In both groups the inter-subject variabilities were relatively evenly distributed  
 127 except for one pianist who was an outlier showing poor performance on the Foot Balance, Foot  
 128 Tracking, and the Piano Loudness tasks.

129 The correlation matrix between the subjects' motor-coordination scores (Fig. 3B) suggests  
 130 relatively weak dependencies, i.e. a subject who showed high coordination in one task did not  
 131 necessarily show high coordination in any other task. There were no significant dependencies within  
 132 the foot measures and the only dependency within the hand measures was between the Piano  
 133 Position and Piano Timing scores ( $r = 0.64$ ,  $p = 0.026$ ). There were a few intriguing correlations  
 134 between foot and hand measures. First, the foot and hand timing scores were highly correlated (Foot  
 135 Up-Down Temporal and Piano Timing:  $r = 0.68$ ,  $p = 0.015$ ). Second, the Foot Up-Down Temporal also  
 136 correlated with the Piano Position ( $r = 0.66$ ,  $p = 0.020$ ). This was expected considering the correlation  
 137 between the piano position and timing scores. These three tasks are metronome based, thus  
 138 measuring rhythmic coordination. Lastly, we found a significant correlation between Foot Balance and  
 139 Piano Loudness scores ( $r = 0.61$ ,  $p = 0.035$ ), but this was driven by the pianist who was an outlier in  
 140 both tasks.

141 In the second experimental session, all subjects performed 10 trials of the Piano Playing task, using  
 142 their left-hand index finger (LHIF) to play notes further to the right of their right-hand. This was  
 143 followed by an additional 10 trials of Piano Playing with the SR3T, where subjects use both degrees of  
 144 freedom within the SR3T for the horizontal reach for the notes to the right and the vertical motion to  
 145 play the note. In both tasks (playing with the LHIF and with the SR3T) subjects showed improvement  
 146 over the first 5 trials after which they plateaued (Fig. 4, right). Thus, for all future analysis we averaged  
 147 over trials 5 to 10 to have a single piano playing score for each of these tasks. Here as well, there were  
 148 no significant differences between the pianists and the naïve players in any of the trials played with

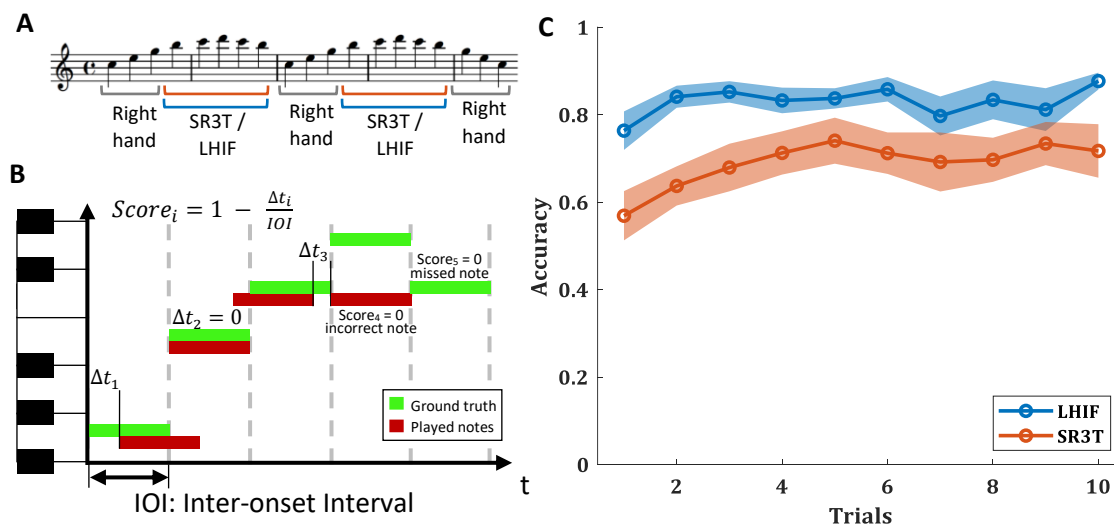

**Fig. 4. Piano playing performance.** (A) The note sequence played for the piano playing task. Notes exclusively played with the right hand, and those with the SR3T or LHIF are marked, (B) Visualisation of how each individual note is scored linearly based on delay from the beat. Incorrect notes and skipped notes are assigned a score of 0, full sequence score is the average of all individual scores, (C) Accuracy over trials with the SR3T (orange) and without, using the LHIF (blue).

149 their LHIF (t-test  $p > 0.12$ ) and with the SR3T (t-test  $p > 0.32$ ). Testing over all plateau trials (5-10),  
 150 pianists were significantly better in playing with their LHIF (t-test  $p = 0.017$ ) but there were no group  
 151 differences in playing with the SR3T (t-test  $p = 0.9$ ). Therefore, we merged the two groups and all  
 152 further analysis was done on all 12 subjects together.

153 The Piano Playing with SR3T score is our metric for performance with the human augmentation  
 154 device, and the fundamental question is to what extent can it be explained by motor-coordination  
 155 measures. The correlations between the subjects' scores in the Piano Playing tasks and the motor-  
 156 coordination measures suggest different dependencies for playing with and without the SR3T (See  
 157 supplementary, Fig. S1 & Fig. S2). The scores in the Piano Playing task with the LHIF, which required  
 158 no foot interface, were significantly correlated with Foot Tracking and Foot Up-Down Temporal scores  
 159 ( $r = 0.66$ ,  $p = 0.019$  and  $r = 0.64$ ,  $p = 0.026$ , respectively). The scores in Piano Playing with SR3T were  
 160 significantly correlated only with the Piano  
 161 Loudness scores ( $r = 0.59$ ,  $p = 0.044$ ).

162 The pianist who was an outlier in few  
 163 motor-coordination measures was also an  
 164 outlier in the Piano Playing with the SR3T  
 165 score (but not in Piano Playing without) and  
 166 is driving the correlation with the Piano  
 167 Loudness. Thus, we further investigated the  
 168 correlations between Piano Playing with  
 169 SR3T and the motor-coordination scores with  
 170 Spearman rank correlation scores (Fig.  
 171 S1). Foot Up-Down Temporal was the only  
 172 measure which showed significant  
 173 Spearman correlation with the Piano Playing  
 174 with SR3T score ( $r(\text{Spearman}) = 0.67$ ,  $p =$   
 175  $0.02$ ). The Piano Playing scores without and  
 176 with SR3T were highly correlated even with  
 177 the outlier ( $r = 0.63$ ,  $p = 0.028$ ), and even  
 178 better correlated with Spearman rank  
 179 correlation ( $r(\text{Spearman}) = 0.71$ ,  $p = 0.012$ ).

180 Since none of the motor-coordination  
 181 scores explained the Piano Playing with  
 182 SR3T score well, we asked whether a  
 183 combination of motor-coordination scores  
 184 can explain it. We specifically asked which  
 185 combination could better explain it – that of  
 186 the hand measures, which includes piano-  
 187 based tasks as well as the only score where  
 188 the pianists were significantly better than  
 189 the naïve players (Hand Dimensionality); or  
 190 that of the foot measures, considering it  
 191 being the control interface of the SR3T.  
 192 Generalized linear models were fitted to the  
 193 hand (Fig. 5A) and foot (Fig. 5B) measures  
 194 trying to explain the Piano Playing with SR3T

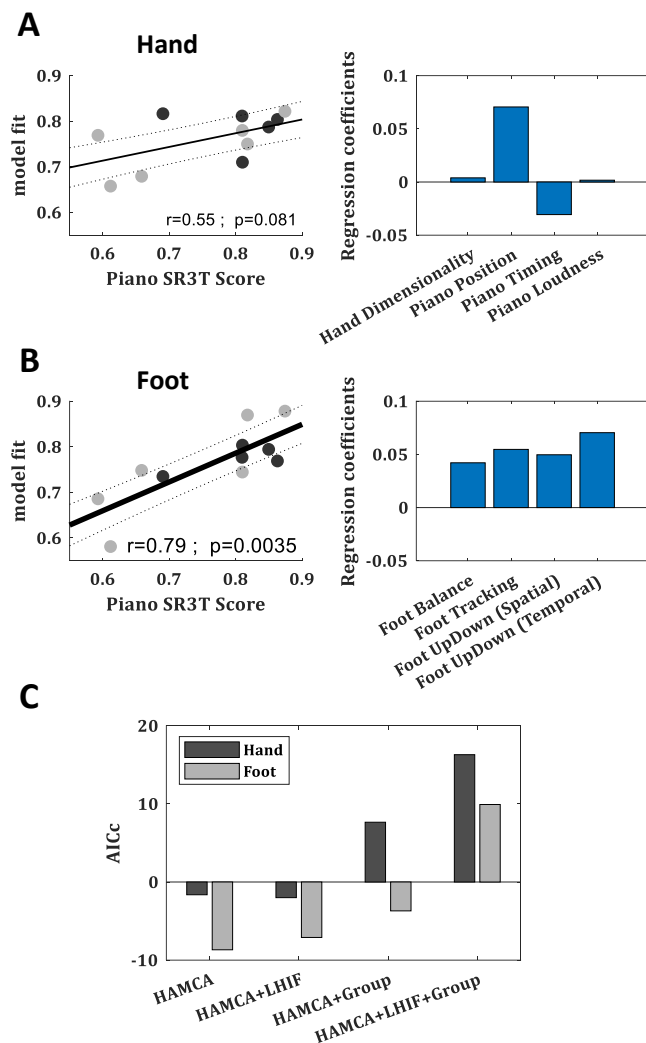

**Fig. 5. Model predictions for SR3T piano playing.** N=11 subjects after outlier removal. Naïve subjects marked as grey and experienced subjects as black dots. (A) model from the 4 HAMCA hand dexterity measures. (B) model from the 4 HAMCA foot dexterity measures. (C) The corrected Akaike information criterion (AICc) for the HAMCA foot and HAMCA hand models, as well as the models with additional component of the LHIF piano playing score, the expertise group (experienced vs naïve), or both.

195 score. To account for the impact of the outlier subject, we removed them and fitted the Generalized  
196 linear models to the remaining 11 subjects. While both models could explain most of the variance in  
197 the SR3T Piano Playing score, the Generalized linear models based on foot measures showed a much  
198 better fit than the one based on the hand measures ( $r = 0.79$  and  $r = 0.55$ , respectively) and was the  
199 only significant fit ( $p = 0.0035$  and  $p = 0.081$ , respectively). Moreover, while in the foot model all scores  
200 had positive contributions to the model with similar magnitudes, the hand model was dominated by  
201 Piano Position while Piano Timing had negative contribution and Hand Dimensionality and Piano  
202 Loudness had none. We then tried Generalized linear models where we added the LHIF Piano Playing  
203 score (without SR3T) to the hand and foot models (See supplementary, Fig. S3 A&B). While it  
204 performed better for both models ( $r = 0.87$  and  $r = 0.92$  respectively,  $p < 0.005$ ), it still showed more  
205 contribution from the foot measures than the hand, and thus better performance in the Foot+LHIF  
206 model.

207 Next, we tested for the contribution of piano expertise to the prediction by adding it to the model  
208 (Fig. S3 C&D). Adding expertise improved both models, though to a lesser extent than adding the LHIF  
209 Piano Playing score ( $r = 0.63$  and  $r = 0.89$  respectively,  $p < 0.05$ ). The expertise had no contribution to  
210 the models with the LHIF Piano Playing score (Fig. S3 E&F). To compare between these models of  
211 different complexity we used the corrected Akaike information criterion (AICc) which is modified for  
212 small sample sizes. AICc estimate the amount of information that is lost while fitting a model and thus  
213 can measure the quality of different models relative to each other. The information criterion clearly  
214 show that the foot models are better than the hand models (Fig. 5C). While information criteria might  
215 be biased to select models with more parameters and overfit, the AICc was developed to address such  
216 potential overfitting. With this correction, the AICc suggests that the best model is the Foot model  
217 without the LHIF Piano Playing score and the piano expertise.

218 Lastly, we fitted all models to all 12 subjects, including the outlier subject who drives the  
219 correlations (See supplementary, Fig. S4). While both hand and foot model could now significantly  
220 explain most of the variance in the SR3T Piano Playing score ( $p < 0.01$ ) the model based on foot  
221 measures showed a better fit than the one based on the hand measures ( $r = 0.92$  and  $r = 0.71$ ,  
222 respectively).

## 223 Discussion

224 In this study we addressed a gap in our understanding of human augmentation technology which  
225 is how human-in-the-loop interaction with an augmentative device is learned and performed by the  
226 human brain. We had previously described the different neurocognitive barriers to successful  
227 embodiment and use of robotic augmentation devices<sup>15</sup>. Here, following the operational definition  
228 set out in the same work<sup>15</sup> for the embodiment of robotic augmentation as the ability to use extra  
229 limbs in natural tasks, we focused on how different parameters within the remit of human motor  
230 control contribute to successful control of a supernumerary robotic finger in an augmented piano  
231 playing task. We created a supernumerary robotic 3rd thumb (SR3T), controlled through substitution,  
232 initially with a combination of the natural thumb and the foot wearing different sensing modalities.  
233 We first demonstrated, in an unconstrained pilot experiment, the feasibility of human augmentation  
234 with the SR3T, with one experienced piano player using the device to freely play the piano using 11  
235 fingers, within 1 hour of wearing it. We then updated our SR3T interface, so that both degrees of  
236 freedom are controlled through a single IMU worn on the foot, and developed the HAMCA set to  
237 assess the participants' motor coordination within the hand (task-space) and the foot (interface-  
238 space) prior to piano playing. This is followed by our subjects playing a piano sequence on the piano  
239 using their natural fingers, and then using the SR3T along with their natural fingers. Our findings  
240 suggest that it is not your expertise in the task you perform with the supernumerary robotic finger



241 (i.e. piano playing expertise), nor your task-space coordination (i.e. motor coordination of the hand  
242 and fingers), but your interface-space coordination (i.e. foot coordination) that can predict your level  
243 of task performance with the augmented device.

244 While half of our subjects were experienced pianists and the other half naïve, there were not many  
245 significant differences between the two groups within our experiments. The only motor-coordination  
246 score in the HAMCA in which the experienced pianists performed significantly different to the naïve  
247 players was hand dimensionality (HD, see Fig. 3A). The notion that as a skill evolves into an expertise  
248 one learns to use more degrees of freedom in the movement, is known since the pioneering work of  
249 Nikolai Bernstein. Bernstein found that professional blacksmiths use high variability in their joint  
250 angles across repetitive trials to achieve low variability in their hammer end-point trajectory<sup>49</sup>.  
251 Pianists need to get their hands to posture with independent control of digits which are not common  
252 in daily life. Thus, they should be able to control more degrees of freedom in their hand movement.  
253 We would have expected to see significant differences on the piano-based tasks as well as timing-  
254 based tasks with the foot, given the pianists' experience. This is, however, not the case within our  
255 performance results (see Fig. 3.A), which might be due to the design of the tasks within HAMCA not  
256 capturing that difference.

257 Looking at correlations between the different motor coordination scores (Fig. 3.B), we see a high  
258 and significant correlation between Piano Position (PP), Piano Timing (PT) and Foot Up-Down  
259 Temporal (FUD<sub>T</sub>) tasks. These are the only three tasks relying on a timing-based measure, with a  
260 metronome-controlled beat. Therefore, they are measuring rhythmic coordination, and presumably  
261 relay on a common timing mechanism<sup>50</sup>, and a common coordination-dependent timing network<sup>51</sup>.  
262 The strong correlations between these measures is suggesting that rhythmic coordination is a personal  
263 trait similarly performed in both the fingers (for PP and PT) and the foot (FUD<sub>T</sub>).

264 In the piano playing task, all subjects (naïve players and experienced pianists alike) initially showed  
265 improvement in accuracy from trial to trial (i.e. learning). This was a short learning process which  
266 plateaued quickly after 5 trials. For all subjects the plateau with the SR3T was significantly lower than  
267 with their LHIF, which is to be expected, particularly in early stage of SR3T use. This fast learning within  
268 a session and low plateau (which leaves much room for improvement in future sessions) are hallmarks  
269 of early motor skill learning. This is in line with many evidence of multiple time scales in skill learning  
270 where fast improvement in performance occurs in the initial training and plateau within a session, and  
271 slow improvement develops across sessions e.g. 52–55. Accordingly, learning to play the piano,  
272 augmented with the SR3T, seems to be a novel motor skill learning task. Further support can be found  
273 in the group differences while playing the piano with and without the SR3T. When subjects played  
274 with their own LHIF, across all plateau trials pianists performed better than naïve players, as expected  
275 based on their piano experience. Though, surprisingly, there were no significant group differences on  
276 a trial by trial basis, not during learning nor during plateau. When subjects played with the SR3T there  
277 were also no significant group differences on a trial by trial basis, but also across all plateau trials  
278 pianists did not perform better than naïve players. This suggests that playing augmented with the SR3T  
279 is not a trivial extension of the regular piano sequence playing task with your own finger, but a novel  
280 skill that the subjects need to learn.

281 The correlations of the SR3T piano playing score with all motor coordination measures (See  
282 supplementary, Fig. S1) suggest no one-to-one mapping. While most measures showed some positive  
283 correlation trend, hand dimensionality – the best metric for piano playing expertise – showed no  
284 correlation, and even a slightly negative trend. This is in line with the lack of difference between  
285 experienced pianists and naïve players in performance with the SR3T. The two measures that showed  
286 the strongest correlations to the SR3T score were Piano Loudness and Foot Up-Down Temporal. Yet,

287 Piano Loudness correlation was driven by the outlier and Foot Up-Down Temporal showed significant  
288 rank correlation but no Pearson or robust correlation. Overall, no motor coordination measure can  
289 predict the SR3T piano playing score by itself. The only measure that showed high correlation with the  
290 SR3T score was the LHIF piano playing score. Thus, while piano playing experience showed no  
291 significant contribution to the performance in the SR3T task, performance in the same task without  
292 the SR3T is a good predictor of the performance with the SR3T. Given the good performance of the  
293 LHIF score as a predictor of the SR3T score, it is interesting to consider which of the HAMCA measures  
294 correlate with it. Looking at correlations between the coordination measures and the LHIF piano  
295 playing score, we see Foot Tracking showing a significant and robust correlation with the LHIF score,  
296 rather than any of the hand related scores.

297 Next, we asked if a combination of motor coordination measures from HAMCA can predict  
298 performance with the SR3T, and if so, which set of measures would be a better predictor – that of the  
299 hand coordination measures, directly linked to playing the piano; or that of the foot coordination  
300 measures, which are linked to the control mechanism of the SR3T. Our results suggest that the set of  
301 foot coordination measures is a good predictor of performance with the SR3T (Fig. 5). The regression  
302 coefficients of the four measures are within the same range, suggesting a balanced contribution of  
303 these different measures. The model based on hand coordination measures does not perform as well  
304 in prediction. Furthermore, the contributions of the measures are unbalanced relative to how foot  
305 measures contributed to the foot-based model. Hand dimensionality which was the best metric to  
306 distinguish pianists from naïve subjects shows a minimal contribution to the model. Piano position  
307 and timing measures are showing reverse contributions, even though they are highly and significantly  
308 correlated (see Fig. 3).

309 Our results suggest that the human motor coordination skill in using the control interface of the  
310 robotic augmentation device (in our case, the foot) is the best predictor of how well the augmented  
311 human performs with the robotic system; this is confirmed through AICc in comparison with models  
312 arising from different combinations of features. Interestingly, skills otherwise relating to the actual  
313 task do not serve as good predictors either, i.e. in the case of piano playing, the hand-related motor  
314 coordination measures from HAMCA which the piano task heavily relies on are not good predictors of  
315 how well the human will perform, even though one of them (hand dimensionality) serves as the best  
316 predictor of piano playing expertise. Previous work on interfaces for supernumerary robotics have  
317 shown that the foot can generally serve as a good interface for robotic limbs working collaboratively  
318 with the user's hands e.g. <sup>23,56,57</sup>. Abdi et al. <sup>23</sup> study the control of a third robotic hand via the foot in  
319 virtual reality, for robotic surgery applications, showing similar learning trends to what we observe  
320 here. We see similar effects where roboticists have used legs and feet as a multi-DOF control interface  
321 for successfully teleoperating two <sup>58</sup> or four <sup>59</sup> robotic arms, albeit in less skilled tasks than what we  
322 show here. Saraji et. al. show that subjects significantly increased their self-reported sense of  
323 embodiment of the tele-operated robots over the course of the experiments, i.e. 40 minutes <sup>58</sup>. Results  
324 obtained with adaptive foot interfaces for robot control e.g. <sup>60</sup>, where data-driven approaches are used  
325 to create subject-specific motion mapping, are in line with our findings. Huang et al. <sup>60</sup> report that  
326 inter-subject variability decreases once a subject-specific motion mapping is enabled. This confirms  
327 the dependency of robot control performance on metrics inherent to each subject, which we present  
328 here to be the interface space motor coordination skills.

329 Our work shows the possibility of humans being able to quickly acquire a skilled behaviour, such as  
330 playing piano sequences, with a human augmentative robotic system. Both naïve piano players (i.e.  
331 without prior experience) and piano playing experts demonstrated the same ability to integrate the  
332 supernumerary robotic limb: We saw no difference in the performance with the SR3T, suggesting that

333 integrating robotic augmentation is primarily driven by a priori motor coordination skills and not  
334 affected significantly by expert motor domain knowledge. We are looking here at a setup where  
335 supernumerary robotic thumb is controlled by the foot, therefore leading to a transfer of skills across  
336 limbs. While this has not been systematically evaluated before, we can look at the expertise of hand  
337 use and its transference to the foot in the domain of handwriting, where the shape of handwriting is  
338 recognizably transferred from the hand to the foot, and other limbs<sup>61-63</sup>. Similarly, we were expecting  
339 people skilled at piano playing with the hand, would show similar levels of skill when controlling the  
340 piano with the foot. However, surprisingly, this is not the case in our results. This observation might  
341 be due to crudeness in our setup, leading to piano skills not being carried across. Nevertheless, our  
342 unconstrained experiment, and our systematic one both show participants capable of controlling the  
343 robotic thumb to play the piano and to achieve high scores. It could also be the case that the selected  
344 piano sequence was not complex enough for the transfer of skill to emerge, as it is a one handed,  
345 simple melody. We designed our piano piece to ensure comparability with the experimental setup, so  
346 that pre-augmentation the participants would play the main notes with their right hand and then play  
347 the additional notes with the left hand index finger, therefore limiting us to one-handed pieces. The  
348 structure of the music piece itself also needed to be simple enough so that piano-naïve participant  
349 could acquire it within a reasonable amount of time and not immediately fail.

350 It is important to consider the meaning of these results in the context of prosthetics, and human  
351 augmentation in general. Prosthetics replace a limb that was lost whereas with the SR3T, and with  
352 supernumerary robotics in general, the human is operating a new, additional limb – in our case a  
353 thumb. Our augmentation is done through substitution, i.e. we use an existing limb to operate an  
354 additional one. We show here that this makes the system reliant on human motor skills, specifically in  
355 controlling the interface-space. We also demonstrate the possibility of applying substitution across  
356 different levels of the biomechanical hierarchy. The foot, which in terms of the biomechanical  
357 hierarchy is equivalent of the entire hand, is used here as the interface-space controlling a thumb,  
358 which is further down the biomechanical hierarchy. These results sit at one end of the spectrum of  
359 solutions for controlling an augmentative device, which goes from substitution all the way to direct  
360 augmentation via higher level control, either brain-machine-interfacing or cognitive interfaces such as  
361 eye gaze decoding. We previously showed that the end-point of visual attention (where one looks)  
362 can control the spatial end-point of a robotic actuator with centimetre-level precision<sup>8,64,65</sup>. This direct  
363 control modality is more effective from a user perspective than voice or neuromuscular signals as a  
364 natural control interface<sup>66</sup>. We showed that such direct augmentation can be used to control a  
365 supernumerary robotic arm to draw or paint, freeing up the two natural arms to do other activities  
366 such as eating and drinking at the same time<sup>13</sup>. But such direct augmentation has to date not achieved  
367 augmenting fine motor skills such as playing the piano, as playing this instrument requires not just the  
368 execution of a note: it is not a simple button-press exercise, but requires fine grade expression of  
369 temporal and spatial motor coordination across robotic and natural fingers. We show that we can  
370 predict the degree to which subjects can integrate supernumerary limbs into their natural body  
371 movements, as a function of their basic motor skills. Thus, our work shows that we can achieve  
372 effective augmentation but also predict the capability of individuals to embody supernumerary robotic  
373 limbs in real-world tasks, which has impact for robotic augmentation from healthcare to agriculture  
374 and industrial assembly e.g. in the aerospace industry.

## 375 **Materials and Methods**

376 *Experimental design.* For our unconstrained pilot experiment, a right-handed piano player  
377 was selected to wear the SR3T and freely improvise. For our systematic follow-up experiments  
378 we developed a set of measurement protocols and behavioural biomarkers, the Human

379 Augmentation Motor Coordination Assessment (HAMCA), and ran this set of tests to assess  
 380 hand and foot coordination (due to the foot being the control interface for our robotic system,  
 381 described below under *Setup*) and piano-related skills. As opposed to existing motor  
 382 assessments such as the Purdue pegboard <sup>67</sup>, the motor domain of the NIH Toolbox <sup>68</sup>, the  
 383 Jebsen-Taylor hand function test <sup>69</sup> or the Action Research Arm Test <sup>ARAT, 70</sup> among others,  
 384 which tend to be focused on dexterity, and are mainly used to quantify the extent or progress  
 385 of motor disabilities, here we are interested in assessing specific human motor coordination  
 386 aspects which relate to the interface-space (foot) and task-space (hand use over the piano)  
 387 of our piano playing task. The HACMA set includes both spatial and temporal evaluations.  
 388 From these coordination tasks we extracted 8 hand and foot motor-coordination scores.  
 389 Finally, the participants were given specific melodies to play on the piano with and without  
 390 the SR3T. The melody was designed to require 6 fingers, forcing the participant to either use  
 391 their left-hand index finger (LHIF), or the SR3T if they are wearing it. Table 1 summarises the  
 392 experimental setup procedure and how they map to results.

393 **Table 1.** Experimental procedure

| First Session – 2 hours                      | Second session – 1 hour              |                                                      |
|----------------------------------------------|--------------------------------------|------------------------------------------------------|
| Foot Balance (15 trials) – 20 mins           | Piano Playing with LHIF – 25 mins    |                                                      |
| Foot Up-Down (15 trials) – 15 mins           | 5 Practice Trials                    | 10 trials recorded at 80bpm (last 5 count for score) |
| Foot Tracking (6 trials) – 10 mins           |                                      |                                                      |
| Piano Timing (25 trials) – 15 mins           | SR3T setup and calibration – 10 mins |                                                      |
| Piano Positioning (15 trials) – 10 mins      | Piano Playing with SR3T – 25 mins    |                                                      |
| Piano Loudness (25 trials) – 15 mins         | 5 Practice Trials                    | 10 trials recorded at 80bpm (last 5 count for score) |
| Hand Dimensionality (2x toy tasks) – 35 mins |                                      |                                                      |

394  
 395 *Subjects.* Twelve right-handed participants took part in our systematic experiments (mean  
 396 age 23.3+/-2.8 years). Six of the participants had played the piano for several years (pianists  
 397 group) and the other six did not have any piano playing experience (naïve group). All of the  
 398 participants from the pianists group had at least 5 years of piano training (range 5-21 years,  
 399 mean 10.6+/-5.4 years). Two participants of the naïve group had over 5 years' experience of

400 guitar playing. All participants gave informed consent prior to participating in the study and  
401 all experimental procedures were approved by Imperial College Research Ethics Committee  
402 and performed in accordance with the declaration of Helsinki.

403 *Setup.* We created an experimental setup to investigate how individual motor skills  
404 contribute to the performance of a human user of a supernumerary robotic thumb; i.e. a  
405 robotic augmented human. To this end, we have created a 2 degrees of freedom (DoF) robotic  
406 finger that users can wear on the side of their hand, effectively augmenting them with a third  
407 thumb. The design, creation and initial testing of the supernumerary robotic third thumb  
408 (SR3T) was reported in <sup>48</sup>, and is the same setup used for our unconstrained pilot experiment  
409 with a single piano player participant. The design specifications for the SR3T were derived  
410 from the design requirements of a fully spherical operating thumb <sup>71</sup> and the natural  
411 eigenmotions of human thumbs in daily life activities <sup>72</sup>. The SR3T is attached to the user's  
412 right hand and is controlled through the user's right foot. In our original implementation, used  
413 for the pilot experiment, the vertical motion of the foot was measured using an  
414 accelerometer, together with horizontal motion data obtained with a flex sensor worn on the  
415 natural thumb on the augmented hand, to control the vertical and horizontal DoFs of the  
416 SR3T, respectively <sup>48</sup>. For our main experiments, we updated the interface, using a 9DoF  
417 inertial measurement unit (IMU - Bosch BNO055, breakout board by Adafruit) for increased  
418 stability, and to limit the interface to a single limb, i.e. the foot. The unit can provide absolute  
419 orientation measurements (with respect to the earth's magnetic field) thanks to an onboard  
420 sensor fusion algorithm. Absolute orientation can then be extracted as Euler vectors, at  
421 100Hz. In this setup, the SR3T's two DoFs correspond to horizontal and vertical movements  
422 of the robotic fingertip. These are mapped to horizontal and vertical movements of the foot,  
423 i.e. yaw and pitch, respectively. Once the subject is wearing the SR3T on their hand, and the  
424 IMU on their foot, they are asked to sit with their foot on the ground facing the piano. The  
425 SR3T is moved horizontally for the fingertip to face the forward position as well. The values  
426 read by the IMU for the orientation of the foot, and by the motor encoders for the position  
427 of the SR3T are recorded. The subject is then asked to rotate their foot clockwise, with the  
428 heel as the centre of rotation, to their maximum comfortable reach (typically 45 degrees from  
429 the forward-facing pose). The SR3T fingertip is also moved accordingly, to the maximum  
430 horizontal position on the right, and values recorded as before. These are used to map the  
431 horizontal motion of the foot to that of the SR3T, with a similar process for vertical motions.  
432 The setup can be seen in Fig. 1.

433 In order to investigate the workspace augmentation achieved by the SR3T optical markers  
434 were placed at the tip and base of the SR3T, with the SR3T then activated by the subject to  
435 move in its full range of motion. Similarly, optical markers were placed at the tip and base of  
436 the subject's left-hand thumb with them performing the maximum range of thumb  
437 movement while the motion was optically tracked. We used three OptiTrack Prime 13W  
438 cameras with the Motive software for motion capture (NaturalPoint, Inc. DBA OptiTrack,  
439 Oregon, USA). The results can be seen in Fig. 1.E and F; the thumbs' end-point surface is  
440 mapped onto a sphere, assuming the base of the thumbs are situated at the centre. Based on  
441 these measurements, the SR3T has an end-point work surface that is 4 times that of the

442 human thumb. Furthermore, we used the same camera system to measure delay between  
443 motor intention and action, by placing markers on the user's foot as well as the SR3T; the  
444 mean delay is measured as 85msec.

445 For the piano playing tasks and piano related hand coordination tasks we used a digital  
446 piano (Roland RP501R-CB, Roland Corp., Osaka, Japan). The piano was connected to a PC with  
447 a MATLAB script establishing communication through its MIDI interface. Each keystroke on  
448 the piano was received by the MATLAB script as a MIDI message which comprised data  
449 regarding the note played, time of keystroke (with a 1ms resolution) and the keystroke  
450 velocity, which leads to proportional loudness of the note played.

#### 451 **HAMCA foot coordination tasks**

##### 452 *Foot balance task*

453 A Wii Balance Board (Nintendo Co. Ltd., Kyoto, Japan) together with the BrainBloX software<sup>73</sup> was  
454 used. The board (Figure 2A) is made of four pressure plates and the software interface displays the  
455 real-time centre of pressure computed by the Wii Balance Board across all four plates, and relative to  
456 the board's coordinate system.

457 Weight plates (70 N) were placed on the left side of the board, moving the centre of pressure away  
458 from the system origin. Subjects then had to move the centre of pressure back towards the origin by  
459 applying pressure on the right side of the board with their right foot. The plates were placed in three  
460 positions (Figure 2A), with five trials per position, resulting in a total of 15 trials, performed in random  
461 order. Before the beginning of each trial, participants were asked to place the centre of pressure as  
462 close as possible to the origin. Once they stated their readiness and after a 3-seconds countdown, a  
463 15-seconds recording was started. Samples were recorded at 85 Hz. The resulting motor-coordination  
464 score is computed according to equation (1):

$$465 \quad Accuracy = 1 - \frac{error}{maxError} \quad (1)$$

466 Where error corresponds to the mean Euclidean distance of the centre of pressure from the origin  
467 of the coordinate system across all recorded samples. The maximum error corresponds to the error  
468 computed if the subject was not acting on the platform.

##### 469 *Foot up-down task*

470 The same setup as in the Foot Balance Task was used, without the weights. A steady beat was  
471 played with a metronome, which the subjects had to match when moving their feet from a toe-lifted  
472 (dorsiflexion) to a heel-lifted (plantarflexion) pose and vice versa (see Figure 2C). The pressure exerted  
473 by the foot had to match an upper and lower target value marked on the screen. Ideally, the output  
474 should resemble a square signal with a period equivalent to that of the beat on the metronome.  
475 Subjects performed 15 trials in random order, five at each selected tempi: 40bpm, 60bpm and 80bpm.

476 Two types of motor-coordination scores are computed from this task: spatial and temporal, both  
477 using equation (1). For the spatial measure, the error is calculated as the absolute distance between  
478 the target pressure position and the measured position of the centre of pressure. The maximum error  
479 corresponds to the total distance between the upper and lower pressure targets. The temporal  
480 measure's error is based on how precise in time the change between target positions occurs. This is

481 specifically measured at the time of zero-crossing, respective to the beats of the metronome.  
482 Maximum error is the time corresponding to one full period. Both the spatial and temporal absolute  
483 errors had skewed distributions; therefore, the median of the error was utilised instead of the mean.

#### 484 *Foot tracking task*

485 The subjects controlled the 2D position of a dot on a screen through rotations of their ankle,  
486 captured with an inertial measurement unit (IMU) attached to their shoe (see Figure 2B) -- the same  
487 setup used as the control interface of the SR3T. The subjects were directed to use ankle rotations only,  
488 the result of which they could see as a blue dot on a screen. They had to make the blue dot follow the  
489 position of a red dot moving along a figure-of-eight path, as shown in Figure 2B. The path, the red and  
490 blue dots were shown to subjects on a monitor screen in front of them. Each trial is composed of 6  
491 laps around the figure-of-eight path, lasting 35 seconds total. The subjects sat at a height to have their  
492 foot freely moving in space (see Figure 2B). The motor-coordination score for this task follows  
493 equation (1), with the error defined as the Euclidean distance between the blue and red dots. The  
494 maximum error is taken as the maximum recorded error across all time points in all trials of all  
495 subjects. Once again, due to the skewness in the absolute error distribution, the median of the error  
496 was used in the accuracy calculation.

#### 497 **HAMCA hand coordination tasks**

##### 498 *Hand dimensionality*

499 Subjects performed two toy assembly tasks while wearing a Cyberglove II (CyberGlove Systems LLC,  
500 San Jose, CA) to capture the motion of their hand and fingers, with 22 degrees of freedom. The tasks  
501 involved assembling a LEGO DUPLO toy train (LEGO 10874), and assembling a toy car (Take Apart, F1  
502 Racing Car Kit) using a toy drill and screws (see Figure 2, D and E). To ensure the appropriate fit of  
503 Cyberglove II we made sure all participants had a minimum hand length of 18 cm, measured from the  
504 wrist to the tip of the middle finger.

505 Principal Component Analysis (PCA) was performed on the collected data. We relate a greater  
506 number of principal components needed to explain the variance of the motion, to greater hand  
507 coordination<sup>74</sup>. The resulting motor-coordination score is defined as the number of principal  
508 components required to explain 99% of the recorded motion's variance, normalised by the number of  
509 degrees of freedom recorded: 22.

##### 510 *Piano timing*

511 The subjects used their right-hand index finger to press the same piano key at varying tempi  
512 (40bpm, 60bpm, 80bpm, 100bpm and 120bpm) played by a metronome. In total, subjects performed  
513 25 trials in random order (5 at each tempo) composed of 10 keystrokes.

514 The relevant motor-coordination score follows the same concept as that of equation (1); for further  
515 clarity we present it in more detail, in equation (2). The normalised error is the absolute time deviation  
516 from the correct tempo divided by its period; that is, the time between keystrokes (inter-onset  
517 intervals or IOI) minus the period of each tempo in seconds, as shown in equation (2).

$$518 \quad \text{TimingAccuracy} = 1 - \frac{|IOI - (60/\text{tempo}_{bpm})|}{60/\text{tempo}_{bpm}} \quad (2)$$

519 Where tempo is the beats per minute value, hence making  $60/\text{tempo}$  the beat period in seconds.  
520 Nine samples were generated in each trial (given that nine IOI are generated by ten keystrokes);  
521 hence, there were 45 samples generated at each tempo, which had a skewed distribution. The median  
522 of these values was taken as the score at each tempo and then the five tempi's scores were averaged  
523 to obtain a single value for their motor-coordination score in the task.

#### 524 *Piano positioning*

525 The right-hand index finger was used to move back and forth between two keys and press them at  
526 a rate given by the metronome (fixed tempo of 60bpm). Three piano keys were selected, one  
527 positioned in the middle of the piano and the other two spaced 7 whole notes to the left and right of  
528 it. Three combinations of two keys were to be followed: left and middle, middle and right, left and  
529 right (see Figure 2F). In total, subjects performed 15 trials in random order (5 at each key combination)  
530 composed of 12 keystrokes each. The relevant motor-coordination score is defined the same way as  
531 in the piano timing task. Timings are measured between two consecutive and correct key presses -  
532 timings relating to incorrect keypresses were discarded. The latter is done automatically as the note  
533 values will be different to what is expected. In order to make up for cases where participants might  
534 have pressed the incorrect key, or missed a beat, we consider a window of size of the tempo period  
535 (1 second) centred on the correct beat time. If notes are played outside of this window, we assume  
536 that the first keystroke of the interval is a wrong one. As the incorrect notes are already removed, a  
537 time before the window would mean that the same key was pressed twice consecutively and a time  
538 after it would mean that a keystroke was missed. Most of the subjects had no misses or 1 miss out of  
539 165 samples.

#### 540 *Piano loudness*

541 On the digital piano, the loudness of a note depends on the velocity with which the relevant key is  
542 pressed. A fast press will produce a louder sound and vice versa. Subjects were instructed to press a  
543 single key at a target level of loudness, with both the target level and the level at which they pressed  
544 shown to them visually. Before starting the experiment, participants were instructed on how to set  
545 their minimum (0%) and maximum (100%) keystroke loudness values. The piano's recorded loudness  
546 values range from 0 to 127. A very slow key press corresponds to values around 2-8, whereas fast  
547 presses fall within values of 120-127. Participants were allowed to familiarise themselves with the  
548 visual interface by the experiment runner doing one block of trials on themselves, with the participant  
549 watching the interface. Then, they are given up to 5 unrecorded trials to familiarise themselves with  
550 how the key presses relate to numerical values, and for the experiment runner to ensure that they  
551 cover the full range of values in their key presses. They are then asked each to define their own range,  
552 by pressing the key at 0% and 100%. These values are recorded and used to define their range for the  
553 experiment. The loudness values for levels 25%, 50% and 75% are obtained by linear interpolation  
554 between the 0% and 100% values defined for each participant.

555 In total, subjects performed 25 trials, 5 at each loudness level (randomised): 0%, 25%, 50%, 75%  
556 and 100%, composed of 10 keystrokes each. The motor-coordination score is calculated following  
557 equation (1), with the error defined as the deviation from the target values (in percentage loudness)  
558 and maximum error as the maximum committed among all the trials of all of the participants for each  
559 loudness level (these are as follows, Level 0: 34.0833, Level 25: 42.6250, Level 50: 34.6667, Level 75:  
560 28.4583 and Level 100: 24.4167). After analysing the results, the average motor-coordination score  
561 was calculated using only the results at the 25%, 50% and 75% loudness levels given that these targets



562 required more skilled velocity control than the 0% and 100% levels. Thus, their use would enhance  
563 individual differences between participants.

#### 564 **Piano playing**

565 To assess the participants' performance on actual piano playing, a sequence with 38 notes played  
566 at a constant tempo (isochronous) of 80bpm was devised. Subjects were able to learn and follow the  
567 sequence while playing, aided by the software Synthesia (Synthesia LLC). Synthesia showed the notes  
568 of the sequence as coloured blocks scrolling on-screen. The participants had to press the keys  
569 corresponding to the positions on the keyboard with which the Synthesia blocks were aligned in time  
570 to the music in order to score points (see Figure 1). The sequence of notes was designed to be played  
571 mainly with the right hand, plus one finger for notes that were too far to the right side of the right  
572 hand. These notes could then be reached either using the index finger of the left hand, or, if wearing  
573 the SR3T, by activating the robotic finger. On Synthesia, the notes to be played by the right-hand  
574 fingers were coloured in green, and the notes to be reached with the extra finger were coloured blue.  
575 Similarly, the relevant keys on the keyboard were marked with the same colours (see Figure 2F).

576 Subjects played the sequence first without and then with the SR3T for 15 trials in each block. The  
577 first five trials were considered as practice trials (not recorded), the next ten were recorded but only  
578 the last 5 are used for computing the mean piano playing scores per subject due to the fact that  
579 subjects were still learning the sequence, especially the ones with no piano playing experience. For  
580 the first block of trials, without the SR3T, subjects played using their right hand for green coloured  
581 notes while blue coloured ones were played with the left-hand index finger. To achieve this, subjects  
582 had to cross their left hand over the right one. For the second block of trials, the left index finger was  
583 replaced by the SR3T. We score each individual keypress's timing as follows:

$$584 \quad \text{Score} = 1 - \frac{\Delta T}{IOI/2} \quad (3)$$

585 where  $\Delta T$  is the absolute time difference between the keypress and metronome beat, and IOI is  
586 the corresponding beat time period. Therefore, the participants receive a full score for each correct  
587 keypress at the exact correct time, with the score linearly decreasing for time deviations, up to half  
588 the beat period on each side, at which point the score is 0. Incorrect notes within this window are  
589 obviously marked as 0 too. We then average the note scores for the entire sequence.

590 In some trials, recordings were stopped prematurely due to technical errors. In all such cases, the  
591 score is calculated with respect to the recorded section only. However, if less than 50% of the notes  
592 are recorded, then the trial is discarded. This happened only in two trials from the same subject which  
593 were removed. No other trials for any subjects had any missed recordings. There were also cases  
594 where participants missed one initial beat, leading to them being off-beat for the entire sequence. To  
595 adjust for this, we calculate the scores for the sequence as originally timed, plus if it were started one  
596 beat early, or one beat late. We then take the highest score of the three cases to represent the piano  
597 playing score for that trial. This only occurred twice.

#### 598 **Statistical Analysis**

599 We first tested for statistically significant differences between the pianists and the naïve players in  
600 each of the HAMCA motor-coordination scores, using student t test. We then calculated the  
601 correlation matrix between the motor-coordination scores of all subjects, looking for dependencies  
602 between the HAMCA tasks and scores.

603 For the analysis of the piano playing performance with the LHIF and with the SR3T we addressed  
604 trials 5 to 10, after the initial fast learning plateau. Using t test, we looked for significant differences  
605 between the pianists and the naïve players in the scores of the trials played with their LHIF and with  
606 the SR3T. We then averaged over trials 5 to 10 to get a single piano playing score for each subject in  
607 each task to be used in all following analysis. We also merged the two groups (pianists and the naïve  
608 players) so that all test of interactions between the HAMCA motor-coordination scores and the piano  
609 playing scores were across all subjects. We then calculated the correlations between the subjects'  
610 scores in the piano playing tasks and the HAMCA motor-coordination scores. To account for an outlier  
611 subject, we further investigated the correlations with Spearman rank correlation scores.

612 We then fitted generalized linear models to explain the piano playing scores using two different  
613 sets of HAMCA motor-coordination scores: the HAMCA hand measures and the HAMCA foot  
614 measures. We first removed the outlier subject before fitting the models (in the main text), and later  
615 repeated the analysis with the outlier (in the supplementary figures). We then tested for the  
616 contribution of piano expertise and the LHIF playing score to the prediction by adding them to the  
617 model (each of them separately and both together). To compare between these models of different  
618 complexity we used the corrected Akaike information criterion (AICc) which is modified for small  
619 sample sizes.

## 620 References

- 621 1. Reiter, R. Eine neue elektrokunsthand. *Grenzgeb. Med.* **1**, 133–135 (1948).
- 622 2. Zollo, L., Roccella, S., Guglielmelli, E., Carrozza, M. C. & Dario, P. Biomechatronic design and  
623 control of an anthropomorphic artificial hand for prosthetic and robotic applications.  
624 *IEEE/ASME Trans. Mechatronics* **12**, 418–429 (2007).
- 625 3. Farina, D. *et al.* The extraction of neural information from the surface EMG for the control of  
626 upper-limb prostheses: emerging avenues and challenges. *IEEE Trans. Neural Syst. Rehabil.*  
627 *Eng.* **22**, 797–809 (2014).
- 628 4. Bensmaia, S. J. Biological and bionic hands: natural neural coding and artificial perception.  
629 *Philos. Trans. R. Soc. B Biol. Sci.* **370**, 20140209 (2015).
- 630 5. Godfrey, S. B. *et al.* The SoftHand Pro: Functional evaluation of a novel, flexible, and robust  
631 myoelectric prosthesis. *PLoS One* **13**, (2018).
- 632 6. Aszmann, O. C. *et al.* Elective amputation and bionic substitution restore functional hand use  
633 after critical soft tissue injuries. *Sci. Rep.* **6**, (2016).
- 634 7. Benabid, A. L. *et al.* An exoskeleton controlled by an epidural wireless brain–machine interface  
635 in a tetraplegic patient: a proof-of-concept demonstration. *Lancet Neurol.* **18**, 1112–1122  
636 (2019).
- 637 8. Shafti, A., Orlov, P. & Faisal, A. A. Gaze-based, context-aware robotic system for assisted  
638 reaching and grasping. in *Proceedings - IEEE International Conference on Robotics and*  
639 *Automation* vols 2019-May 863–869 (Institute of Electrical and Electronics Engineers Inc.,  
640 2019).
- 641 9. Hussain, I., Salvietti, G., Spagnoletti, G. & Prattichizzo, D. The Soft-SixthFinger: A Wearable EMG  
642 Controlled Robotic Extra-Finger for Grasp Compensation in Chronic Stroke Patients. *IEEE Robot.*  
643 *Autom. Lett.* **1**, 1000–1006 (2016).
- 644 10. Haddadin, S. & Croft, E. Physical human-robot interaction. in *Springer Handbook of Robotics*

- 645 1835–1874 (Springer International Publishing, 2016). doi:10.1007/978-3-319-32552-1\_69.
- 646 11. Maurtua, I. *et al.* FourByThree: Imagine humans and robots working hand in hand. in *IEEE*  
647 *International Conference on Emerging Technologies and Factory Automation, ETFA* vols 2016-  
648 November (Institute of Electrical and Electronics Engineers Inc., 2016).
- 649 12. Shafti, A. *et al.* Real-time robot-assisted ergonomics. in *2019 International Conference on*  
650 *Robotics and Automation (ICRA) 1975–1981* (IEEE, 2019).
- 651 13. Dziemian, S., Abbott, W. W. & Faisal, A. A. Gaze-based teleprosthetic enables intuitive  
652 continuous control of complex robot arm use: Writing & drawing. *Proc. IEEE RAS EMBS Int.*  
653 *Conf. Biomed. Robot. Biomechatronics* **2016-July**, 1277–1282 (2016).
- 654 14. Parietti, F. & Asada, H. Supernumerary Robotic Limbs for Human Body Support. *IEEE Trans.*  
655 *Robot.* **32**, 301–311 (2016).
- 656 15. Makin, T. R., De Vignemont, F. & Faisal, A. A. Neurocognitive barriers to the embodiment of  
657 technology. *Nat. Biomed. Eng.* **1**, 1–3 (2017).
- 658 16. Llorens-Bonilla, B., Parietti, F. & Asada, H. H. Demonstration-based control of supernumerary  
659 robotic limbs. in *IEEE International Conference on Intelligent Robots and Systems* 3936–3942  
660 (2012). doi:10.1109/IROS.2012.6386055.
- 661 17. Wu, F. & Asada, H. Supernumerary robotic fingers: An alternative Upper-limb prosthesis. in  
662 *ASME 2014 Dynamic Systems and Control Conference, DSCC 2014* vol. 2 (American Society of  
663 Mechanical Engineers, 2014).
- 664 18. Hussain, I. *et al.* Design and prototype of supernumerary robotic finger (SRF) inspired by fin  
665 ray® effect for patients suffering from sensorimotor hand impairment. in *RoboSoft 2019 - 2019*  
666 *IEEE International Conference on Soft Robotics* 398–403 (Institute of Electrical and Electronics  
667 Engineers Inc., 2019). doi:10.1109/ROBOSOFT.2019.8722748.
- 668 19. Tiziani, L. *et al.* Empirical characterization of modular variable stiffness inflatable structures for  
669 supernumerary grasp-assist devices. *Int. J. Rob. Res.* **36**, 1391–1413 (2017).
- 670 20. Hussain, I., Spagnoletti, G., Salvietti, G. & Prattichizzo, D. Toward wearable supernumerary  
671 robotic fingers to compensate missing grasping abilities in hemiparetic upper limb. *Int. J. Rob.*  
672 *Res.* **36**, 1414–1436 (2017).
- 673 21. Wu, F. & Asada, H. ‘Hold-and-manipulate’ with a single hand being assisted by wearable extra  
674 fingers. in *Proceedings - IEEE International Conference on Robotics and Automation* vols 2015-  
675 June 6205–6212 (Institute of Electrical and Electronics Engineers Inc., 2015).
- 676 22. Mehring, C. *et al.* Augmented manipulation ability in humans with six-fingered hands. *Nat.*  
677 *Commun.* **10**, 2401 (2019).
- 678 23. Abdi, E., Burdet, E., Bouri, M. & Bleuler, H. Control of a supernumerary robotic hand by foot:  
679 An experimental study in virtual reality. *PLoS One* **10**, (2015).
- 680 24. Parietti, F. & Asada, H. Independent, voluntary control of extra robotic limbs. in *Proceedings -*  
681 *IEEE International Conference on Robotics and Automation* 5954–5961 (Institute of Electrical  
682 and Electronics Engineers Inc., 2017). doi:10.1109/ICRA.2017.7989702.
- 683 25. Liang, X., Cheong, H., Chui, C. K. & Yeow, C. H. A fabric-based wearable soft robotic limb. *J.*  
684 *Mech. Robot.* **11**, (2019).
- 685 26. Al-Sada, M., Höglund, T., Khamis, M., Urbani, J. & Nakajima, T. Orochi: investigating  
686 requirements and expectations for multipurpose daily used supernumerary robotic limbs. in

- 687 *ACM International Conference Proceeding Series* (Association for Computing Machinery, 2019).  
688 doi:10.1145/3311823.3311850.
- 689 27. Santello, M. *et al.* Hand synergies: Integration of robotics and neuroscience for understanding  
690 the control of biological and artificial hands. *Physics of Life Reviews* vol. 17 1–23 (2016).
- 691 28. Wu, F. & Asada, H. Implicit and Intuitive Grasp Posture Control for Wearable Robotic Fingers:  
692 A Data-Driven Method Using Partial Least Squares. *IEEE Trans. Robot.* **32**, 176–186 (2016).
- 693 29. Valero-Cuevas, F. J. & Santello, M. On neuromechanical approaches for the study of biological  
694 and robotic grasp and manipulation. *J. Neuroeng. Rehabil.* **14**, 101 (2017).
- 695 30. Bromberg, Z., Donchin, O. & Haar, S. Eye movements during visuomotor adaptation represent  
696 only part of the explicit learning. *eNeuro* **6**, (2019).
- 697 31. Haar, S., Donchin, O. & Dinstein, I. Dissociating visual and motor directional selectivity using  
698 visuomotor adaptation. *J. Neurosci.* **35**, 6813–6821 (2015).
- 699 32. Krakauer, J. W., Pine, Z. M., Ghilardi, M. F. & Ghez, C. Learning of visuomotor transformations  
700 for vectorial planning of reaching trajectories. *J. Neurosci.* **20**, 8916–8924 (2000).
- 701 33. Taylor, J. A., Krakauer, J. W. & Ivry, R. B. Explicit and implicit contributions to learning in a  
702 sensorimotor adaptation task. *J. Neurosci.* **34**, 3023–3032 (2014).
- 703 34. Telgen, S., Parvin, D. & Diedrichsen, J. Mirror reversal and visual rotation are learned and  
704 consolidated via separate mechanisms: Recalibrating or learning de novo? *J. Neurosci.* **34**,  
705 13768–13779 (2014).
- 706 35. Wilterson, S. A. & Taylor, J. A. Implicit visuomotor adaptation remains limited after several days  
707 of training. *bioRxiv* 711598 (2019) doi:10.1101/711598.
- 708 36. Yang, C. S., Cowan, N. J. & Haith, A. M. De novo learning versus adaptation of continuous  
709 control in a manual tracking task. *bioRxiv* 2020.01.15.906545 (2020)  
710 doi:10.1101/2020.01.15.906545.
- 711 37. Van Der Vliet, R. *et al.* Individual differences in motor noise and adaptation rate are optimally  
712 related. *eNeuro* **5**, (2018).
- 713 38. Wu, H. G., Miyamoto, Y. R., Castro, L. N. G., Ölveczky, B. P. & Smith, M. A. Temporal structure  
714 of motor variability is dynamically regulated and predicts motor learning ability. *Nat. Neurosci.*  
715 **17**, 312–321 (2014).
- 716 39. Haar, S., van Assel, C. M. & Faisal, A. A. Motor learning in real-world pool billiards. *Sci. Rep.* **10**,  
717 20046 (2020).
- 718 40. Maselli, A. *et al.* Where Are You Throwing the Ball? I Better Watch Your Body, Not Just Your  
719 Arm! *Front. Hum. Neurosci.* **11**, 505 (2017).
- 720 41. Haar, S. & Faisal, A. A. Brain Activity Reveals Multiple Motor-Learning Mechanisms in a Real-  
721 World Task. *Front. Hum. Neurosci.* **14**, (2020).
- 722 42. Di Cagno, A. *et al.* Motor learning as young gymnast’s talent indicator. *J. Sport. Sci. Med.* **13**,  
723 767–773 (2014).
- 724 43. Johnston, K., Wattie, N., Schorer, J. & Baker, J. Talent Identification in Sport: A Systematic  
725 Review. *Sports Medicine* vol. 48 97–109 (2018).
- 726 44. Lopes, V. P., Rodrigues, L. P., Maia, J. A. R. & Malina, R. M. Motor coordination as predictor of  
727 physical activity in childhood. *Scand. J. Med. Sci. Sport.* **21**, 663–669 (2011).

- 728 45. Vandorpe, B. *et al.* The value of a non-sport-specific motor test battery in predicting  
729 performance in young female gymnasts. *J. Sports Sci.* **30**, 497–505 (2012).
- 730 46. Olivier, G. N. *et al.* Predicting Motor Sequence Learning in People With Parkinson Disease. *J.*  
731 *Neurol. Phys. Ther.* **43**, 33–41 (2019).
- 732 47. Wadden, K. P. *et al.* Predicting Motor Sequence Learning in Individuals With Chronic Stroke.  
733 *Neurorehabil. Neural Repair* **31**, 95–104 (2017).
- 734 48. Cunningham, J., Hapsari, A., Guilleminot, P., Shafti, A. & Faisal, A. A. The Supernumerary  
735 Robotic 3rd Thumb for Skilled Music Tasks. in *BioRob* (2018).  
736 doi:10.1109/BIROB.2018.8487609.
- 737 49. Bernstein, N. A. The co-ordination and regulation of movements. (1967).
- 738 50. Ivry, R. B. & Hazeltine, R. E. Perception and Production of Temporal Intervals Across a Range of  
739 Durations: Evidence for a Common Timing Mechanism. *J. Exp. Psychol. Hum. Percept. Perform.*  
740 **21**, 3–18 (1995).
- 741 51. Jantzen, K. J., Steinberg, F. L. & Kelso, J. A. S. Functional MRI reveals the existence of modality  
742 and coordination-dependent timing networks. *Neuroimage* **25**, 1031–1042 (2005).
- 743 52. Karni, A. *et al.* The acquisition of skilled motor performance: Fast and slow experience-driven  
744 changes in primary motor cortex. *Proc. Natl. Acad. Sci. U. S. A.* **95**, 861–868 (1998).
- 745 53. Dayan, E. & Cohen, L. G. Neuroplasticity subserving motor skill learning. *Neuron* **72**, 443–454  
746 (2011).
- 747 54. Costa, R. M., Cohen, D. & Nicolelis, M. A. L. Differential corticostriatal plasticity during fast and  
748 slow motor skill learning in mice. *Curr. Biol.* **14**, 1124–1134 (2004).
- 749 55. Papale, A. E. & Hooks, B. M. Circuit changes in motor cortex during motor skill learning.  
750 *Neuroscience* **368**, 283–297 (2018).
- 751 56. Carrozza, M. C. *et al.* A wearable biomechatronic interface for controlling robots with voluntary  
752 foot movements. *IEEE/ASME Trans. Mechatronics* **12**, 1–11 (2007).
- 753 57. Dougherty, Z. & Winck, R. C. Evaluating the performance of foot control of a supernumerary  
754 robotic limb. in *ASME 2019 Dynamic Systems and Control Conference, DSCC 2019* vol. 3  
755 (American Society of Mechanical Engineers (ASME), 2019).
- 756 58. Yamen Saraiji, M. H. D., Sasaki, T., Kunze, K., Minamizawa, K. & Inami, M. MetaArms: Body  
757 remapping using feet-controlled artificial arms. in *UIST 2018 - Proceedings of the 31st Annual*  
758 *ACM Symposium on User Interface Software and Technology* 65–74 (Association for Computing  
759 Machinery, Inc, 2018). doi:10.1145/3242587.3242665.
- 760 59. Sanchez, J. H. *et al.* Four-Arm Manipulation via Feet Interfaces. (2019).
- 761 60. Huang, Y. *et al.* A subject-specific four-degree-of-freedom foot interface to control a surgical  
762 robot. *IEEE/ASME Trans. Mechatronics* 1–1 (2020) doi:10.1109/tmech.2020.2964295.
- 763 61. Raibert, M. H. Motor control and learning by the state space model. in (Massachusetts Institute  
764 of Technology, 1977).
- 765 62. Wright, C. E. Evaluating the special role of time in the control of handwriting \*. *Acta Psychol.*  
766 (*Amst.*) **82**, 5–52 (1993).
- 767 63. Castiello, U. & Stelmach, G. E. Generalized representation of handwriting: Evidence of effector  
768 independence. *Acta Psychol. (Amst.)* **82**, 53–68 (1993).

- 769 64. Maimon-Mor, R. O. *et al.* Towards free 3D end-point control for robotic-assisted human  
770 reaching using binocular eye tracking. in *Rehabilitation Robotics (ICORR), 2017 International*  
771 *Conference on* 1049–1054 (IEEE, 2017).
- 772 65. Tostado, P. M., Abbott, W. W. & Faisal, A. A. 3D gaze cursor: Continuous calibration and end-  
773 point grasp control of robotic actuators. *Proc. - IEEE Int. Conf. Robot. Autom.* **2016-June**, 3295–  
774 3300 (2016).
- 775 66. Noronha, B., Dziemian, S., Zito, G. A., Konnaris, C. & Faisal, A. A. “Wink to grasp”—comparing  
776 eye, voice & EMG gesture control of grasp with soft-robotic gloves. in *Rehabilitation Robotics*  
777 *(ICORR), 2017 International Conference on* 1043–1048 (IEEE, 2017).
- 778 67. Tiffin, J. & Asher, E. J. The Purdue Pegboard: norms and studies of reliability and validity. *J.*  
779 *Appl. Psychol.* **32**, 234–247 (1948).
- 780 68. Reuben, D. B. *et al.* Motor assessment using the NIH Toolbox. *Neurology* **80**, S65–S75 (2013).
- 781 69. Jebsen, R. H., Taylor, N., Trieschmann, R. B., Trotter, M. J. & Howard, L. A. An objective and  
782 standardized test of hand function. *Arch. Phys. Med. Rehabil.* **50**, 311–319 (1969).
- 783 70. Lyle, R. C. A performance test for assessment of upper limb function in physical rehabilitation  
784 treatment and research. *Int. J. Rehabil. Res.* **4**, (1981).
- 785 71. Konnaris, C., Gavriel, C., Thomik, A. A. C. & Faisal, A. A. Ethohand: A dexterous robotic hand  
786 with ball-joint thumb enables complex in-hand object manipulation. in *Biomedical Robotics*  
787 *and Biomechatronics (BioRob), 2016 6th IEEE International Conference on* 1154–1159 (IEEE,  
788 2016).
- 789 72. Konnaris, C., Thomik, A. A. C. & Faisal, A. A. Sparse eigenmotions derived from daily life  
790 kinematics implemented on a dextrous robotic hand. in *2016 6th IEEE International Conference*  
791 *on Biomedical Robotics and Biomechatronics (BioRob)* 1358–1363 (IEEE, 2016).
- 792 73. Cooper, J., Siegfried, K. & Ahmed, A. BrainBloX: Brain and Biomechanics Lab in a Box Software.  
793 (2014).
- 794 74. Belic, J. J. & Faisal, A. A. Decoding of human hand actions to handle missing limbs in  
795 neuroprosthetics. *Front. Comput. Neurosci.* **9**, 1–11 (2015).

796 **Acknowledgments:**

797 The authors thank James Cunningham and Anita Hapsari for their contribution to the SR3T platform  
798 (see Cunningham *et al.*, 2018).

799

800 **Funding:** This research was supported by eNHANCE (<http://www.enhance-motion.eu>) under the  
801 European Union’s Horizon 2020 research and innovation programme grant agreement No. 644000.

802

803 **Author contributions:** AS, PG and AAF did the initial conception of this work; AS, PG, RM and AAF  
804 developed the experimental protocol and hardware/software requirements for it; RM ran the  
805 experiments; AS, SH, RM, AAF analysed and interpreted the data; AS, SH wrote the manuscript; AS, SH  
806 and AAF revised the manuscript.

807

808 **Additional information:** AS, SH, RM and PG declare no competing financial interests. AAF has  
809 consulted for Airbus.

810

811 **Data and materials availability:** All data needed to evaluate the conclusions in the paper are present  
812 in the paper and/or the Supplementary Materials. Our full dataset will be made available on FigShare  
813 upon publication. We can also make these available to reviewers upon request.

814 **Supplementary Materials**

815

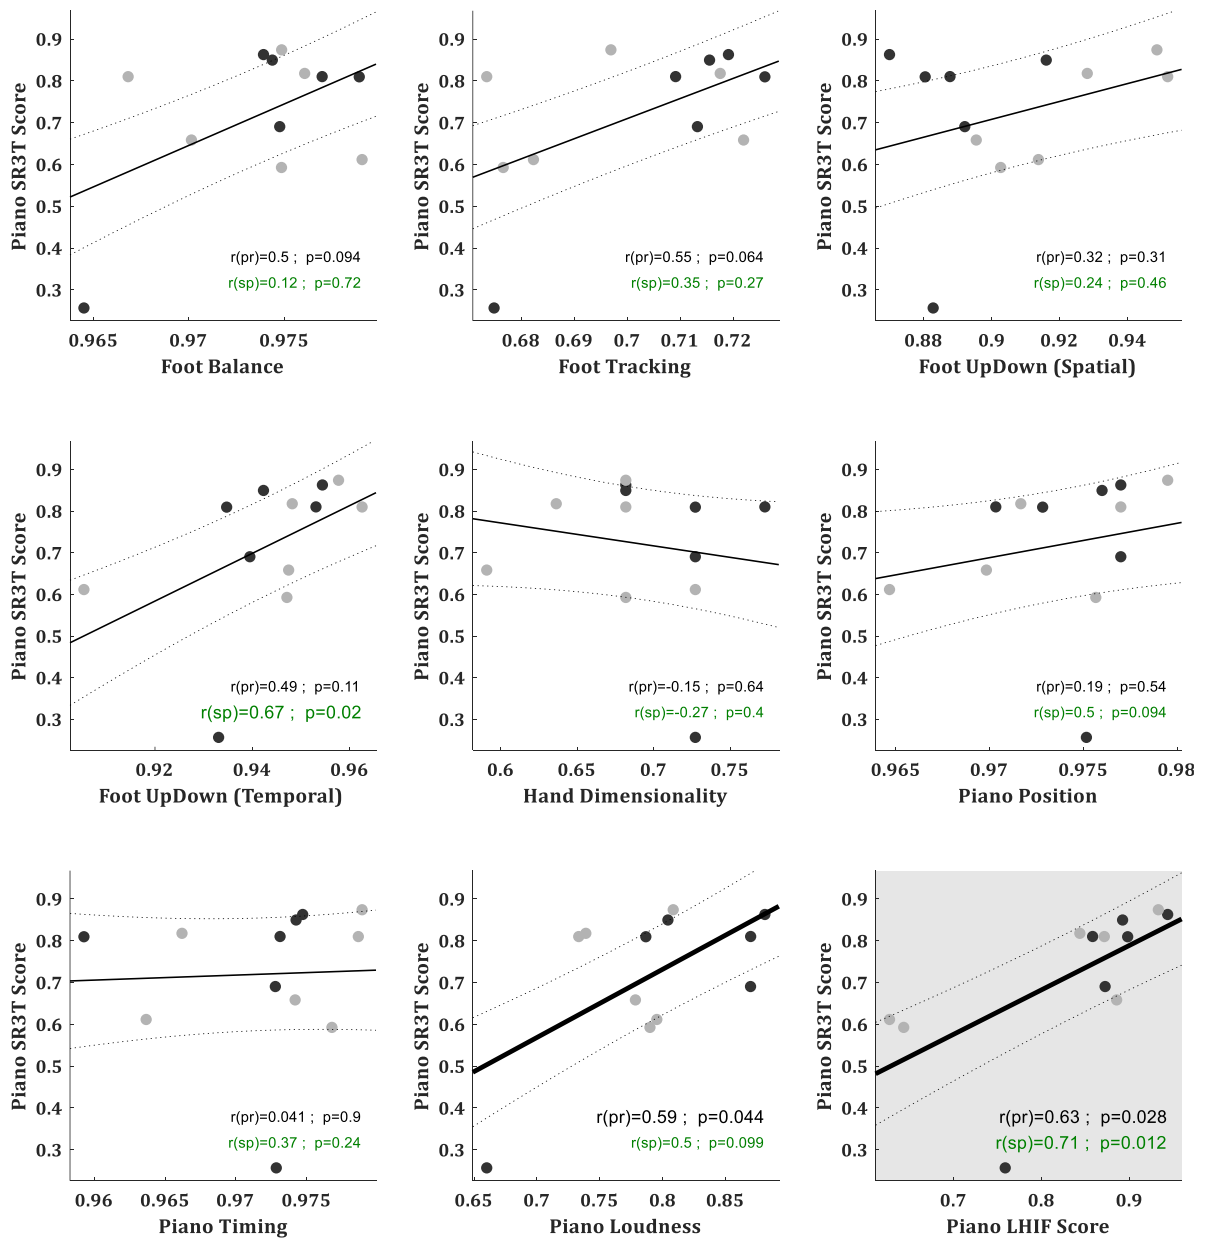

**Fig. S1. Correlations between accuracies.** The first eight panels shows correlations between accuracies in piano playing with the SR3T and in the motor coordination tasks. The ninth panel shows correlations between accuracies in piano playing with and without the SR3T. Naïve subjects marked as grey and experienced subjects as black dots.

816

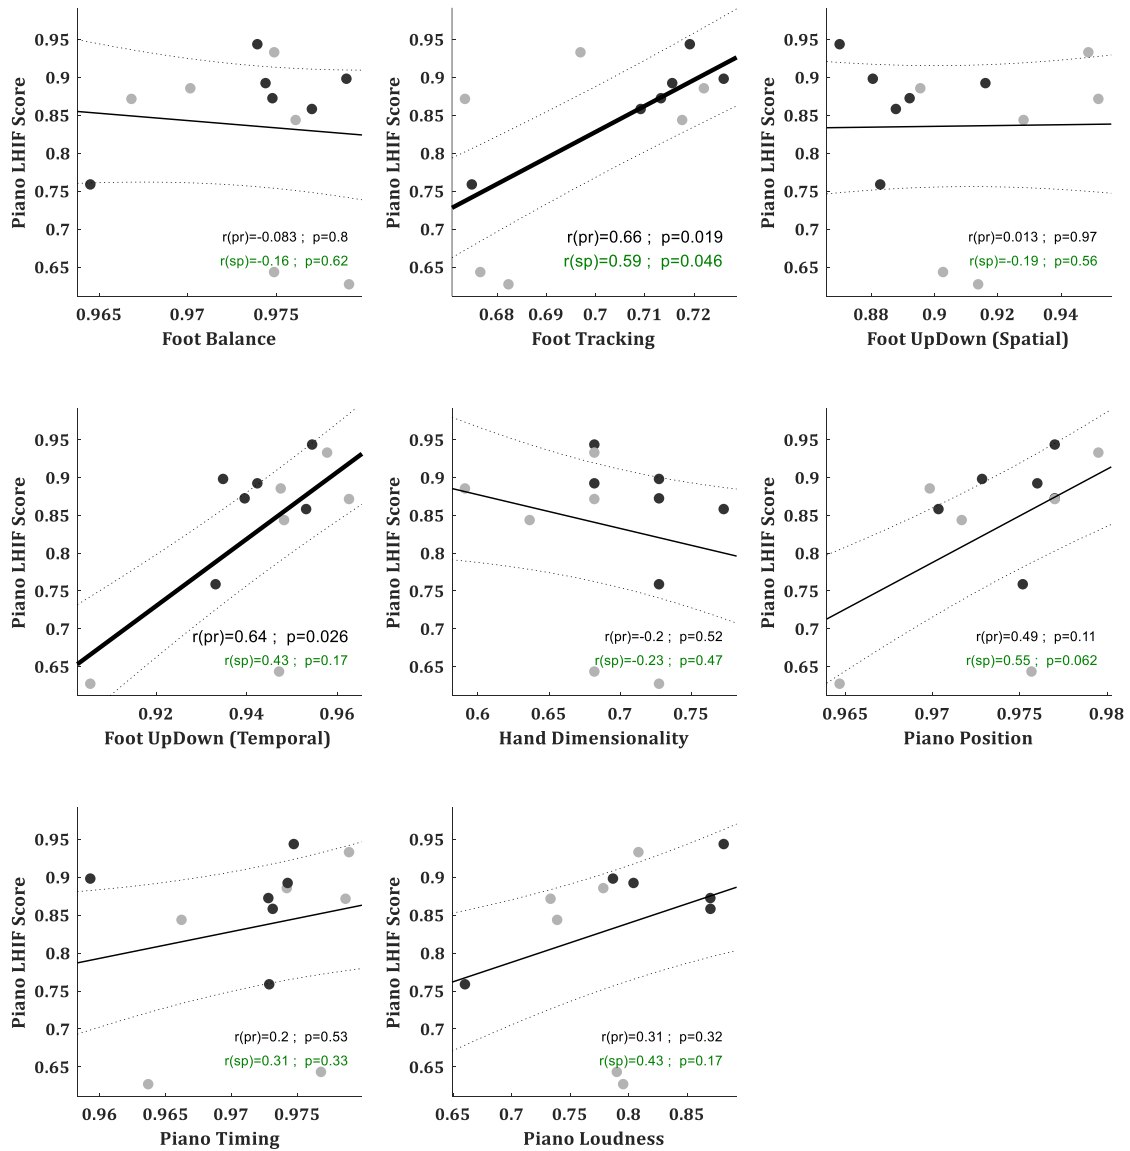

**Fig. S2. Correlations between accuracies.** Correlations between accuracies in piano playing with the LHIF and in the motor coordination tasks.

817



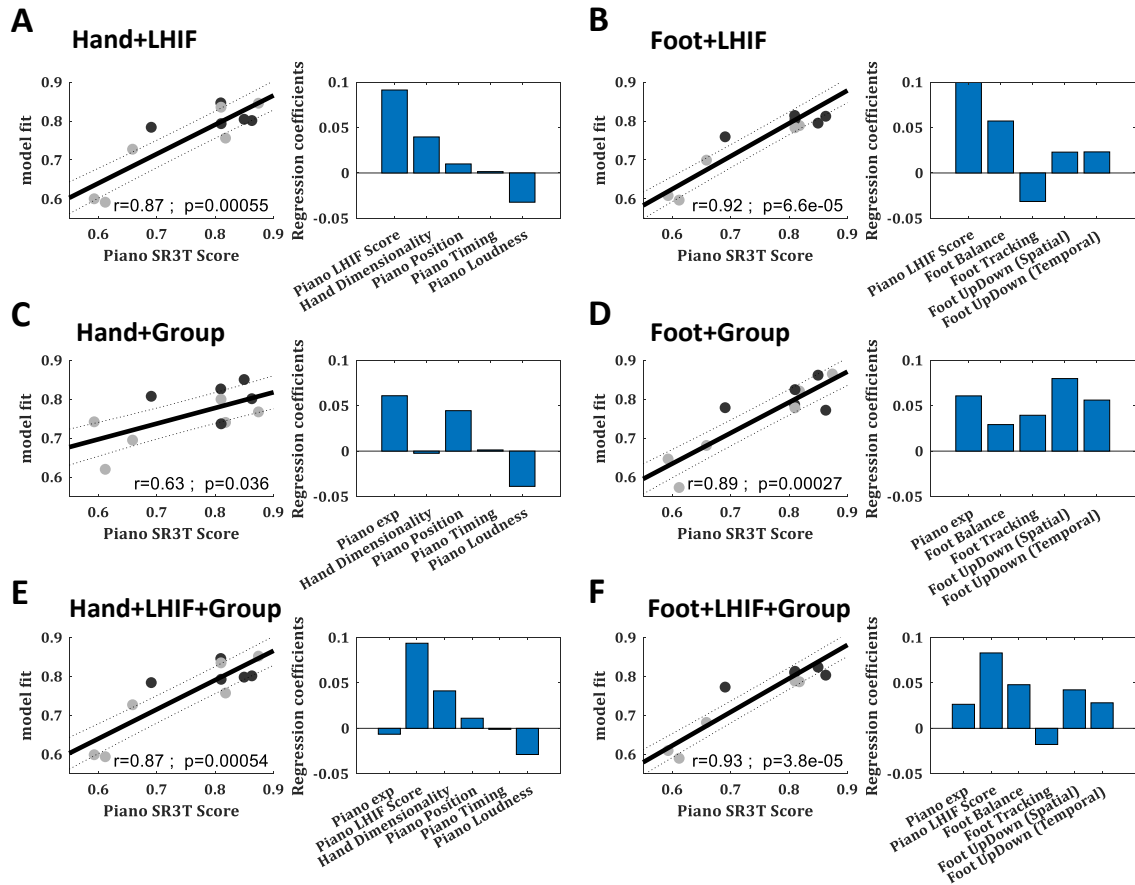

**Fig. S3. Model predictions for SR3T piano playing.** N=11 subjects after outlier removal. Naïve subjects marked as grey and experienced subjects as black dots. **(A-B)** model from the 4 hand **(A)** or foot **(B)** dexterity measures and the LHIF piano playing score. **(C-D)** model from the 4 hand **(C)** or foot **(D)** dexterity measures and the expertise group (experienced vs naïve). **(E-F)** model from the 4 hand **(E)** or foot **(F)** dexterity measures and the LHIF piano playing score and the expertise group.

818

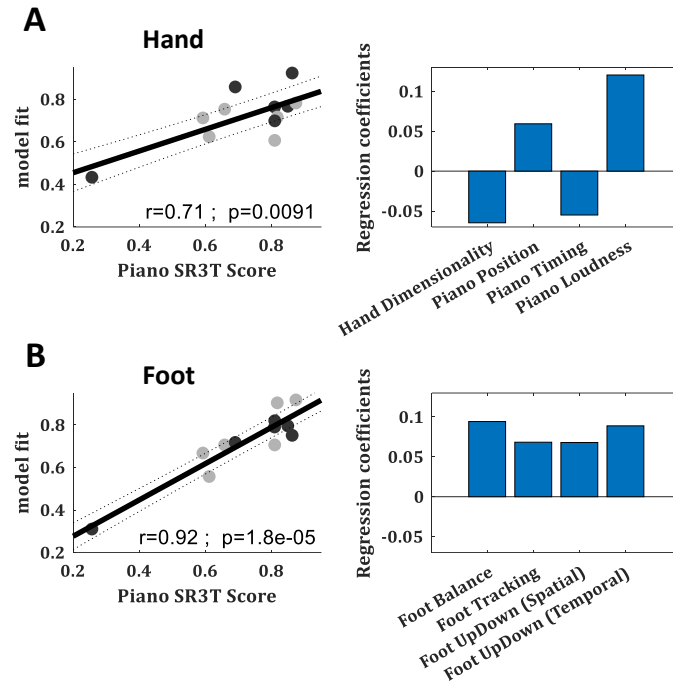

**Fig. S4. Model predictions for SR3T piano playing.** N=12 subjects. Naïve subjects marked as grey and experienced subjects as black dots. **(A)** model from the 4 HAMCA hand dexterity measures. **(B)** model from the 4 HAMCA foot dexterity measures.
